# Supplementary material
Source: publisher site journal article supplement (https://www.dovepress.com/article/520206)
Supplement: Supplementary file 1 [file 520206%20Supplementary%20Material.docx]

**Physical and cognitive impairments at ICU discharge are associated with high long-term mortality in ICU survivors with solid malignancies: a retrospective cohort study**

Appendix 1. Institutional protocols for ICU discharge

Appendix 2. Missing variables and their number for 708 patients

Supplementary Table 1. Chemotherapy resumption after ICU discharge among patients with metastatic disease (n = 550)

Supplementary Table 2. Association of mobility limitation at ICU discharge with mechanical ventilation and causes of ICU admission

**Appendix 1. Institutional protocols for ICU discharge**

1. The patient for whom life-sustaining treatment has been withdrawn.

2. Postoperative or post-procedural intensive monitoring is no longer required.

3. The patient is clinically recovering from shock with systolic blood pressure > 90 mmHg, mean arterial pressure ≥ 65 mmHg, and receiving norepinephrine ≤ 0.1 mcg/kg/min or vasopressin ≤ 0.02 U/min.

4. The patient demonstrates respiratory stability (PaO₂ > 60 mmHg or SpO₂ ≥ 92% on FiO₂ ≤ 0.5, PaCO₂ < 60 mmHg, and pH > 7.3), and no longer requires invasive mechanical ventilation.

Appendix 2. Missing variables and their number for 708 patients

| Missing variable | Number |
| --- | --- |
| BMI at ICU admission | 15 |
| Total bilirubin at ICU discharge | 4 |
| Prothrombin time at ICU discharge | 31 |

Supplementary Table 1. Chemotherapy resumption after ICU discharge among patients with metastatic disease (n = 550)

|  | Hospital survivor (n = 404) | Hospital non-survivor (n = 146) | Total  (n = 550) | p-value |
| --- | --- | --- | --- | --- |
| Chemotherapy after ICU discharge among patients with metastatic disease | 225 (55.7) | 20 (13.7) | 245 (44.5) | < 0.001 |

Supplementary Table 2. Association of mobility limitation at ICU discharge with mechanical ventilation and causes of ICU admission

|  | Mobility limitation (n = 571) | No limitation (n = 137) | P-value |
| --- | --- | --- | --- |
| Duration of mechanical ventilation, median [IQR] | 5.0 [3.0; 10.0] | 2.0 [1.0; 5.0] | < 0.001 |
| Mechanical ventilation > 4 days, n (%) | 216 (37.8) | 9 (6.6) | < 0.001 |
| Causes of ICU admission, n (%) |  |  | < 0.001 |
| Respiratory failure | 256 (44.8) | 39 (28.5) |  |
| Shock | 191 (33.5) | 51 (37.2) |  |
| Cardiac arrest | 21 (3.7) | 1 (0.7) |  |
| Altered mental status | 31 (5.4) | 3 (2.2) |  |
| Metabolic acidosis | 13 (2.3) | 5 (3.6) |  |
| Post-operative/procedure | 27 (4.7) | 21 (15.3) |  |
| Others | 32 (5.6) | 17 (12.4) |  |

Abbreviations: IQR, interquartile range
